# Supplementary material for: Fabrication of Nanoscale Oxide Textured Surfaces on Polymers
Source: MDPI journal article supplement (doi:10.3390/polym13132209), 2021-07-03
Supplement: s1 [file s1]

*Supplementary information*

## Nanoscale texturing of oxide layers on polymers

Barun K. Barick<sup>1</sup>, Neta Shomrat<sup>1</sup>, Uri Green<sup>2</sup>, Zohar Katzman<sup>2</sup>, Tamar Segal-Peretz<sup>1\*</sup>

<sup>1</sup>Department of Chemical Engineering, Technion, Haifa-3200003, Israel

<sup>2</sup>Shamir Optical Industry Ltd, Israel

Corresponding author's email: tamarps@technion.ac.il

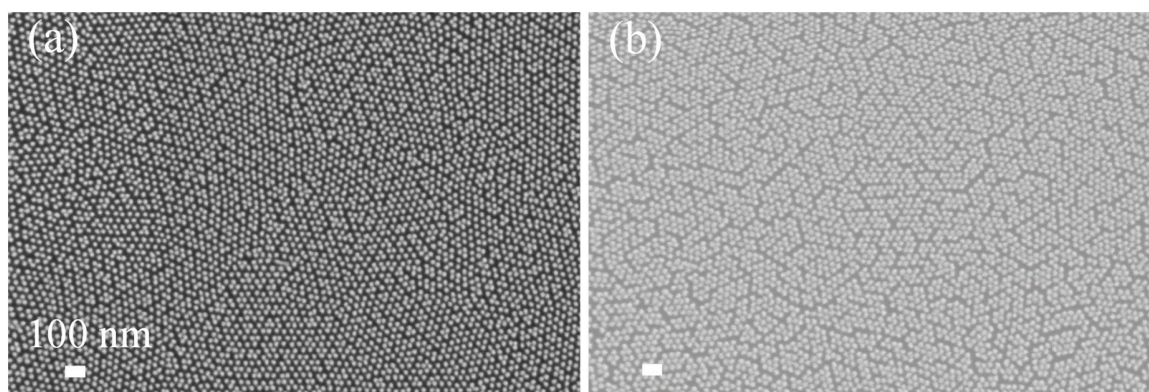

**Figure S1.** SEM images of  $\text{AlO}_x$  cylinders pattern formed on: (a)  $\text{SiO}_2/\text{Si}$  substrate and (b)  $\text{SiO}_2/\text{glass}$  substrate. The  $\text{AlO}_x$  cylinders were fabricated using thermally annealed PS-*b*-PMMA 46.1k-*b*-21k which were subjected to eight cycles of  $\text{AlO}_x$  SIS and subsequent  $\text{O}_2$  etching.

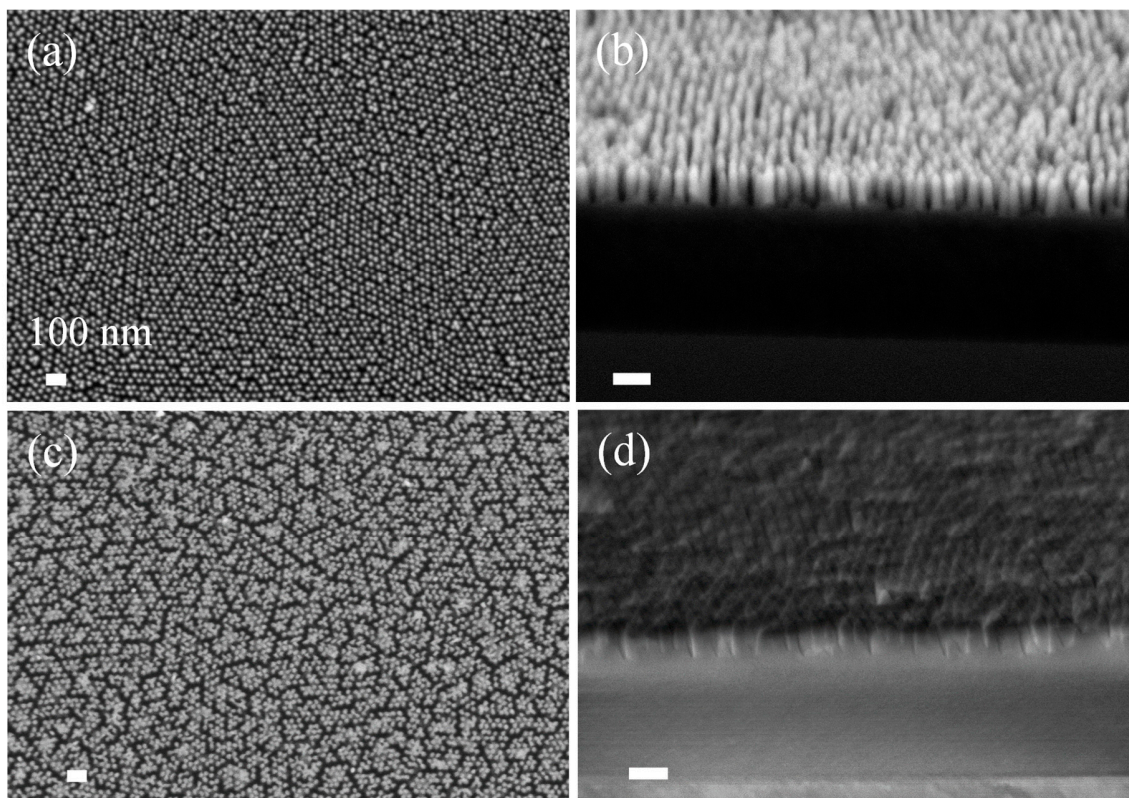

**Figure S2.** Top (a, c) and cross-sectional (b,d) SEM images of SiO<sub>2</sub> nanostructures formed by etching the AlO<sub>x</sub> nanocylinder pattern on SiO<sub>2</sub>/Si substrate (a,b) and SiO<sub>2</sub>/glass substrate (c, d) using 10 min CHF<sub>3</sub> RIE. The average height of nanorods is found to be  $104 \pm 2$  nm.

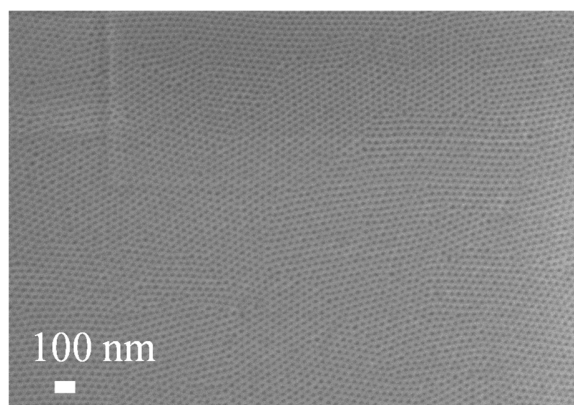

**Figure S3.** Top view SEM image of (a) PS-*b*-PMMA (46.1k-*b*-21k) block-copolymer after thermal annealing at 230 °C. Perpendicular domain orientation of PMMA in the copolymer layer is observed by neutralization of the surface with a P(S-*r*-MMA-*r*-GMA) random copolymer mat layer thermal annealed at 250 °C.

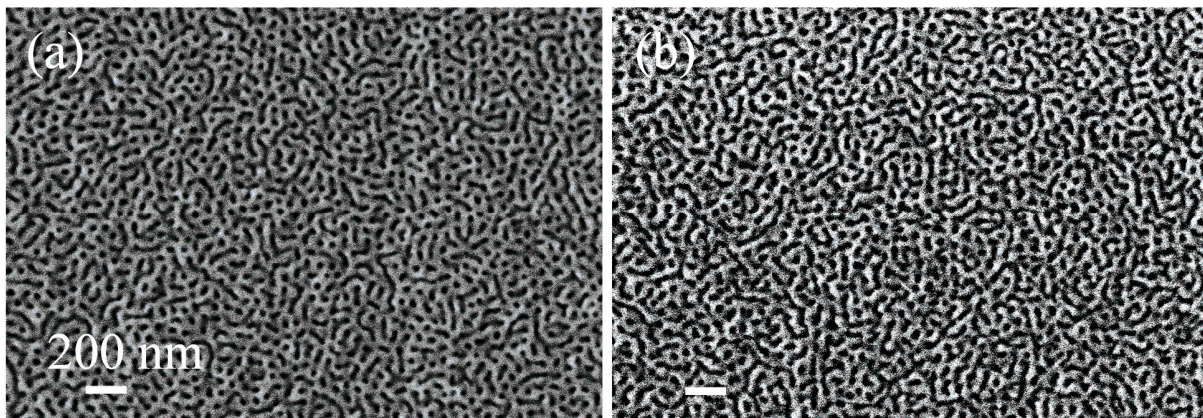

**Figure S4.** SEM image of PS-b-PMMA (140k-b-65k) over SiO<sub>2</sub>/Si substrate vapor annealed for 10 and 20 min in tetrahydrofuran. Prior to BCP, the substrate was neutralized by 0.3 wt% PG-4 77%PS mat layer (UV in optimal crosslink).



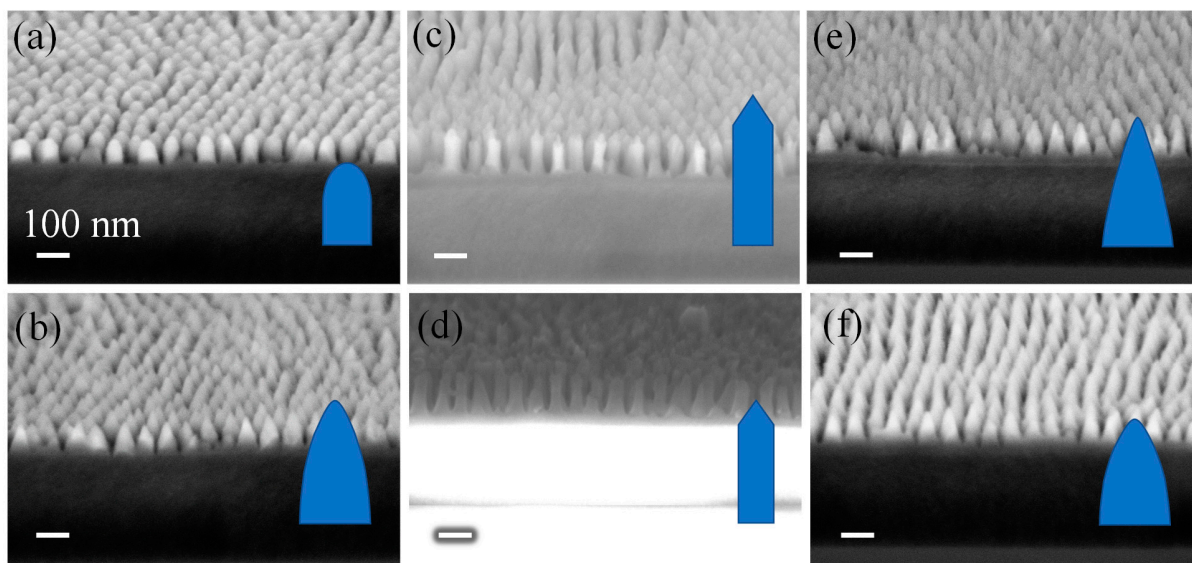

**Figure S5.** SEM image of SiO<sub>2</sub> nanorods array fabricated by different RIE chemistry: anisotropic etching of SiO<sub>2</sub> by CHF<sub>3</sub> (a) 5 min (b) 10 min; isotropic etching of SiO<sub>2</sub> by CF<sub>4</sub>+O<sub>2</sub> (c) 3 min, (d) 4 min, and combination of CHF<sub>3</sub> and CF<sub>4</sub>+O<sub>2</sub> (e) 5 min and 1 min (d) 10 min and 0.5 min, respectively. Respective, inset shows schematic of nanorod morphology (mentioned height and width in nm).

The morphology of nanostructures plays a vital role in controlling the antireflective property of a surface. To pattern different morphologies, isotropic and anisotropic based RIE chemistry are employed to etch nanocylinder patterned SiO<sub>2</sub>/Si substrate. Figure S5 shows the SEM image of SiO<sub>2</sub> nanorods array fabricated by different RIE chemistry, and corresponding schematic morphology is shown in the respective inset. Figures S5a and S5b are the SEM image recorded after 5 and 10 min of RIE using CHF<sub>3</sub>. Anisotropic etching of SiO<sub>2</sub> leads to oval-shaped cylinders. Height and base width are measured to be 87±5 and 51±3 nm for 5 min of RIE. Moreover, more extended etching of 10 min RIE facilitates side etch, creating paraboloidal nanostructures with 103±4 nm of height and 56±2 nm of the base width. Figures S5c and S5d are the SEM image recorded after 3 and 4 min of RIE using isotropic etching of SiO<sub>2</sub> by CH<sub>4</sub>+O<sub>2</sub>. Cylindrical nanorods are observed with CH<sub>4</sub>+O<sub>2</sub> RIE due to enhanced side etching as oxygen reduces the deposition of fluorocarbon inhibitor on sidewall. Height and width are found to be 128±5 and 38±2 nm for 3 min of RIE, which is reduced to 111±4 and 32±4 nm for 4 min case indicating the verge of AlO<sub>x</sub> nanocylinder mask etching. For broadband antireflective coating, a high aspect ratio conical-shaped nanorod with base connected to each other is desired. A successive anisotropic and isotropic etching, i.e., RIE by CHF<sub>3</sub>, followed by CF<sub>4</sub>+O<sub>2</sub>, produces conical structures for 5 min and 1 min, respectively (Figure S5e) and paraboloid for 10 min and 0.5 min, respectively (Figure S5f). Height and base width of cones are found to be 112±4 and 55±7 nm for the former case, due to etching from top, height reduce to 79±6 nm with the base width of 58±3 nm for the latter case.
